# Supplementary material
Source: publisher site journal article supplement (https://www.dovepress.com/article/210107)
Supplement: Supplementary file 1 [file get_supplementary_file.php]

**Supporting Information**

Nano-scaled zeolitic imidazole framework-8 as an efficient carrier for the intracellular delivery of RNase A in cancer treatment

Jiaxin Jia, Shudi Zhang, Kai Wen, Quanshun Li*

*Key Laboratory for Molecular Enzymology and Engineering of Ministry of Education, School of Life Sciences, Jilin University, Changchun 130012, China*

*Corresponding author.

Tel.: +86-431-85155201; Fax: +86-431-85155200.

E-mail: [quanshun@jlu.edu.cn](mailto:quanshun@jlu.edu.cn).


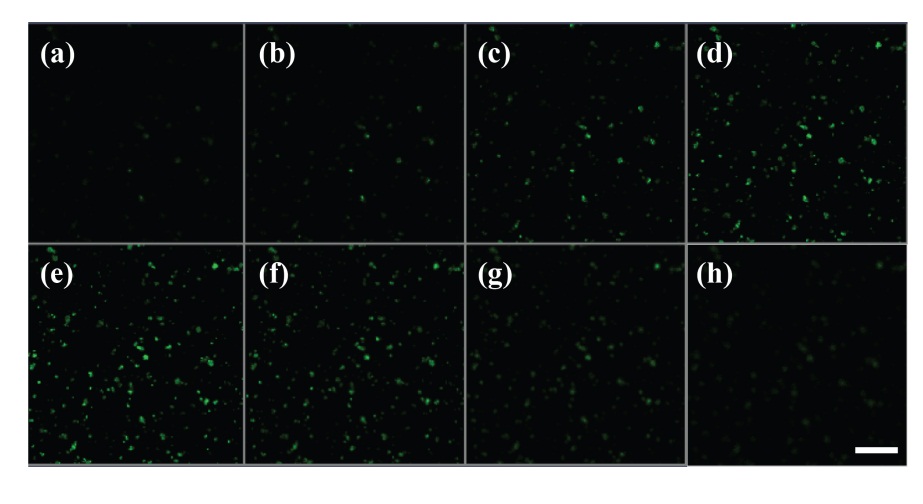


**Figure S1.** Layer-by-layer CLSM images of FITC-RNase A@ZIF-8 at different scanning depth along the z-axis position (a–h). Scale bar: 100 μm.


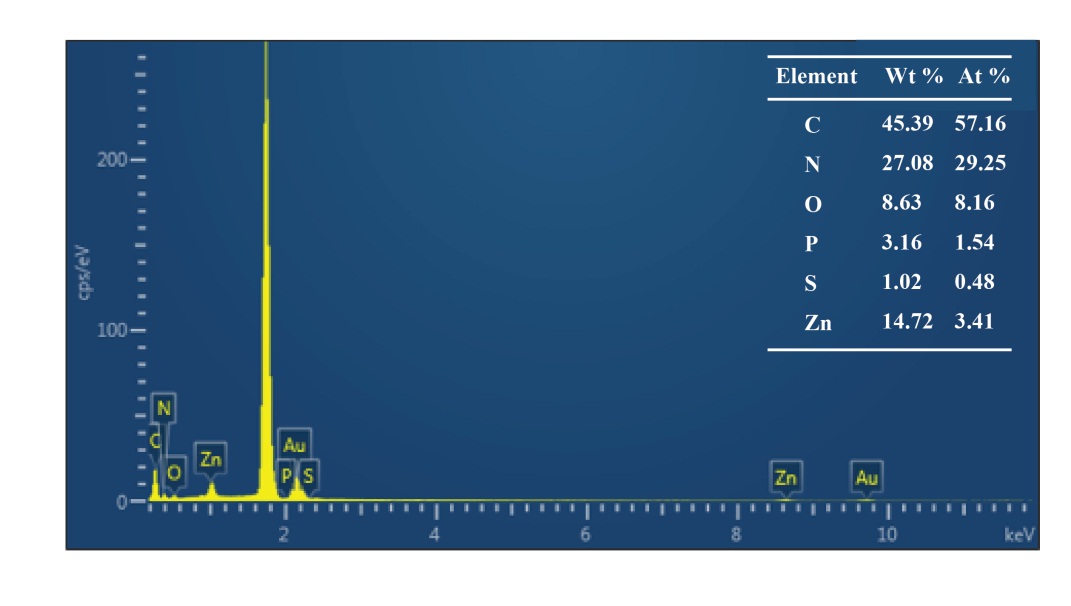


**Figure S2.** The EDS analysis of pure ZIF-8.


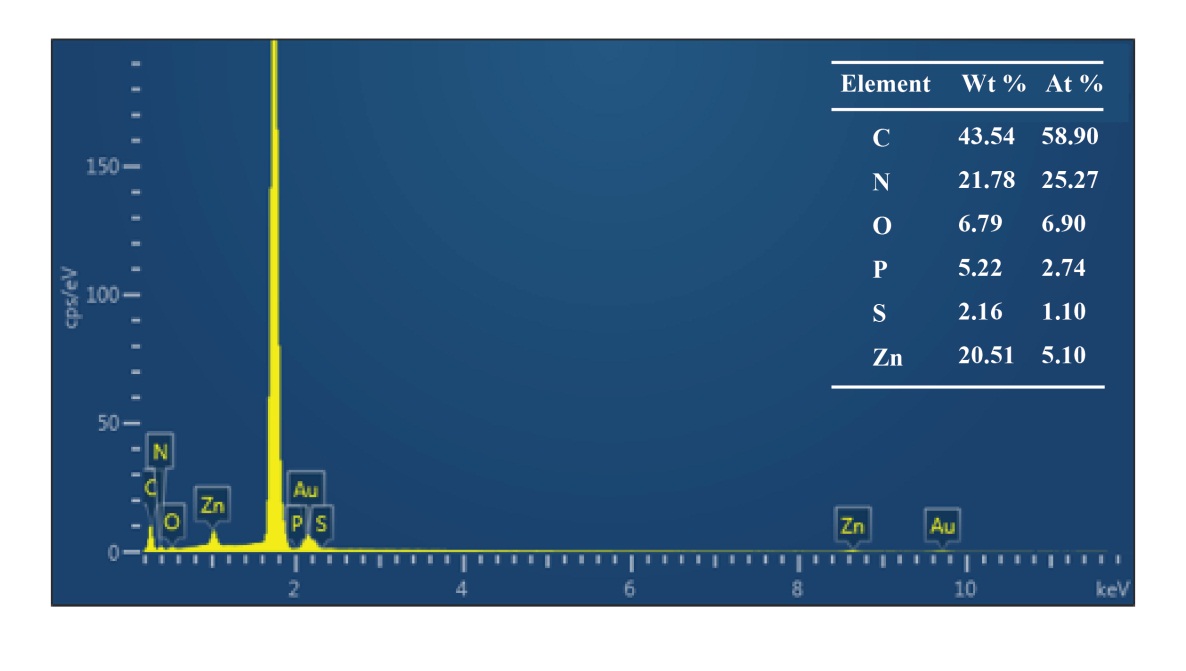


**Figure S3.** The EDS analysis of RNase A@ZIF-8 nanoparticles.


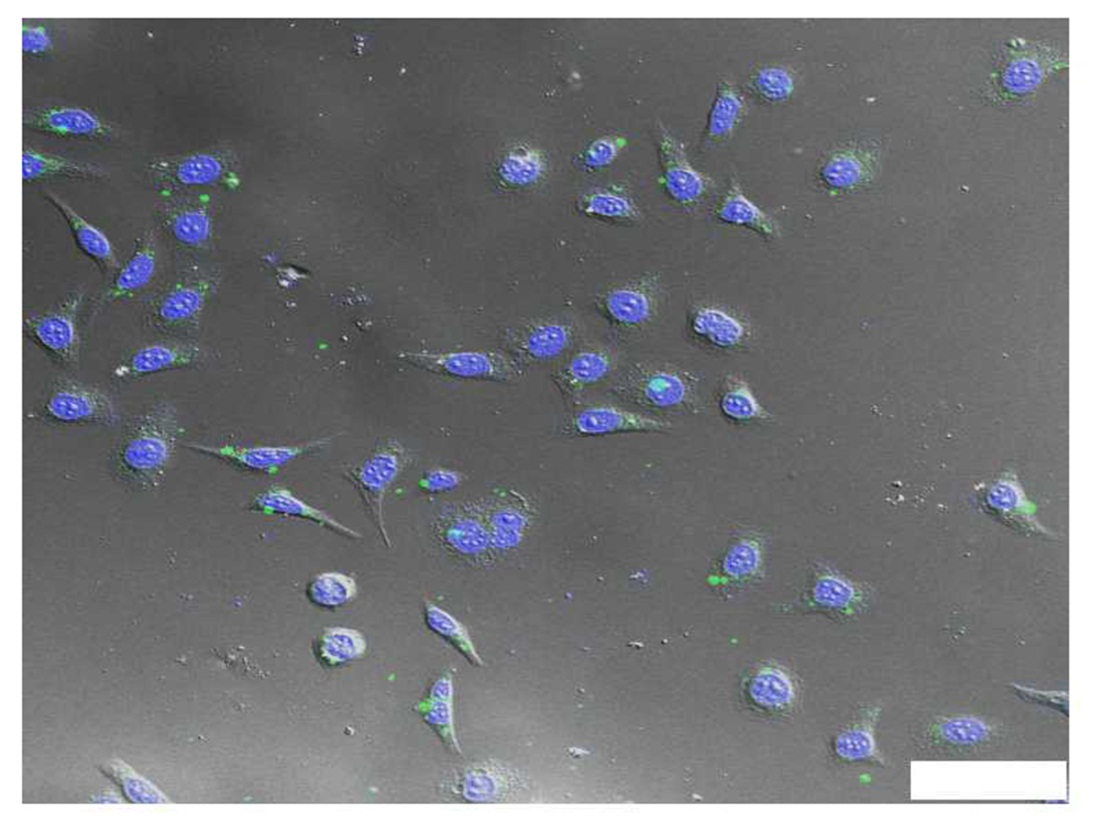


**Figure S4.** The cellular uptake of FITC-labelled RNase A@ZIF-8 nanoparticles in A549 cells, in which the nuclei were stained with DAPI. Scale bar: 50 μm.


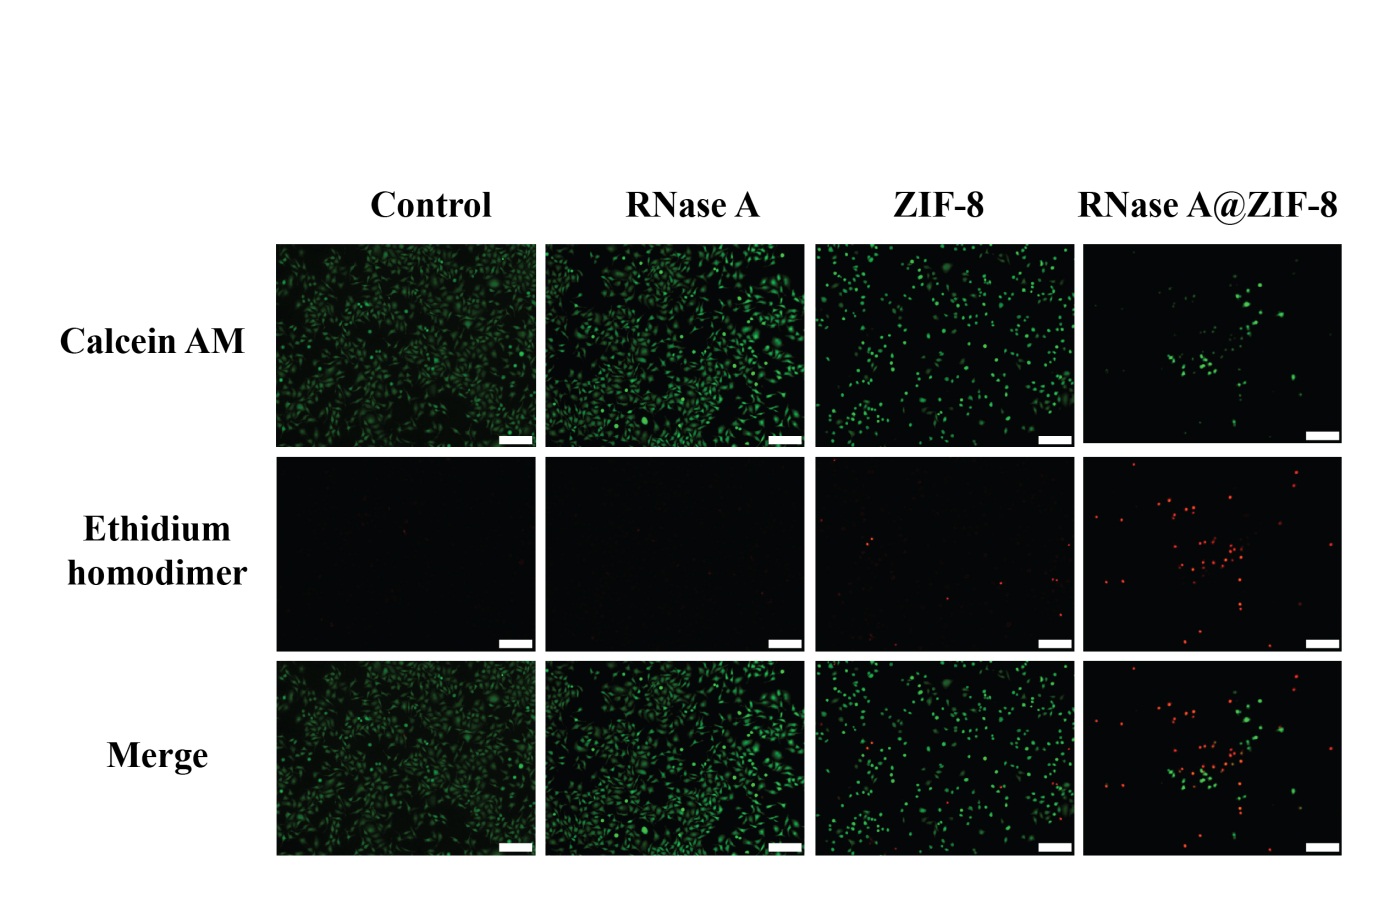


**Figure S5**. Live/Dead staining assay of A549 cells after the treatment with RNase A@ZIF-8 nanoparticles. Scale bar: 100 μm.


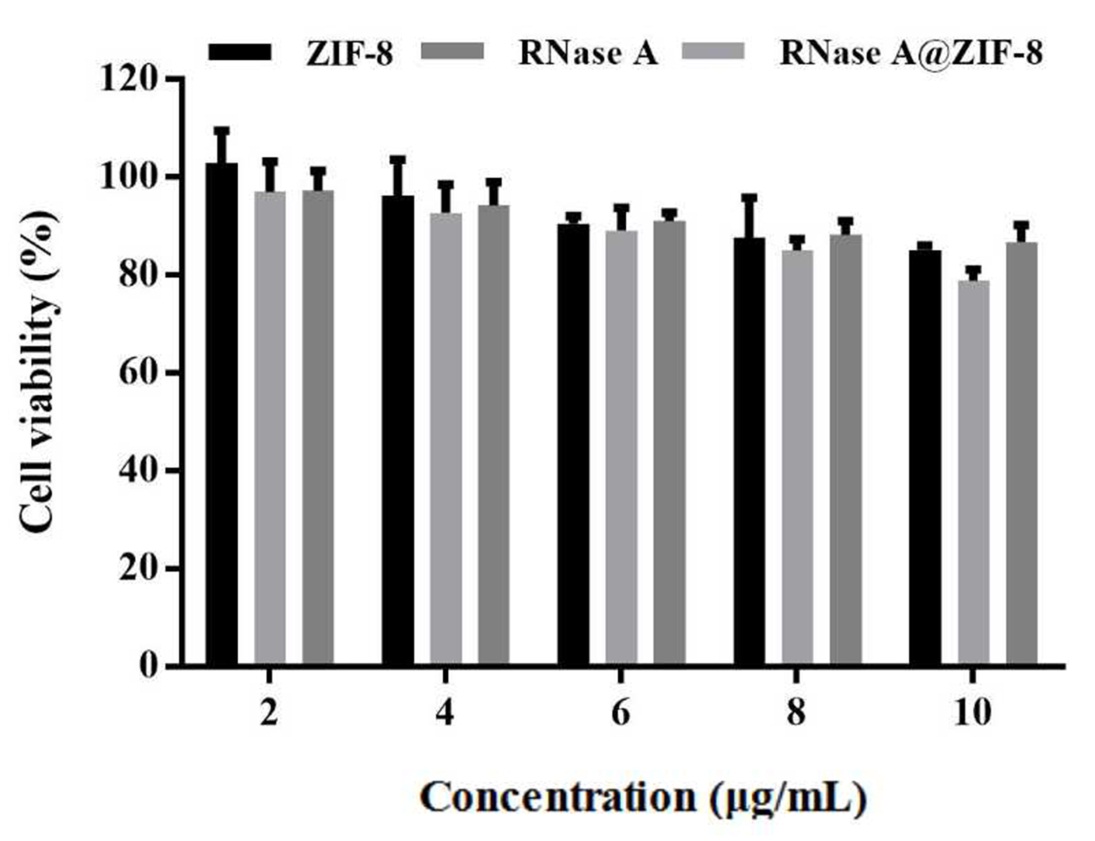


**Figure S6**. Cell viability as a function of ZIF-8, RNase A and RNase A@ZIF-8 nanoparticles with different concentrations, using L02 cells as a model. The dada were expressed as mean value ± SD of triplicate experiments.
